# Supplementary material
Source: PubMed Central journal article supplement (PMC3539685)
Supplement: supp_1202324_Movie_Legends.pdf [file supp_1202324_Movie_Legends.pdf]

## Movies Legends

1  
2  
3  
4  
5  
6  
7  
8  
9  
10  
11  
12  
13  
14  
15  
16  
17  
18  
19  
20  
21  
22  
23

**Movie S1.** Encapsulated H99 *C. neoformans* yeast cells coated with protective mAb 18B7 (IgG1) were unable to fully release new emerging buds, trapping them in a sac-like structure made from the parental mAb-coated capsule.

**Movie S2.** Movie shows budding of encapsulated H99 *C. neoformans* yeast cells coated with protective mAb 2D10 (IgM). Cells also showed impaired bud release, trapping them also in a sac-like structure made from the parental mAb-coated capsule.

**Movie S3.** Movie shows budding of encapsulated H99 *C. neoformans* yeast cells coated with non-protective mAb 13F1 (IgM). MAb 13F1-coated cryptococcal cells showed full release of new emerging buds.

**Movie S4.** Movie shows normal bud release in H99 *C. neoformans* yeast cells.

**Movie S5.** Movie shows capsule Young's Modulus measurements using a polystyrene bead held in place by the optical trap. The microscope stage is set to move with a velocity of  $0.076 \mu\text{m/s}$ . The vertical white lines indicate position  $Vt$  for zero force on the trap, so that  $\Delta p$  is the distance between the bead center and these lines. As the cells move, the white lines move away from the initial position (center of the bead). Video acquisitions were performed at 2 frames/second. Video acceleration is 15 frames/second. Scale bar:  $10\mu\text{m}$ . Encapsulated H99 *C. neoformans* yeast cells are of

24 control (no mAb) or 0.01, 0.1, 0.5, 1.0, 10, and 20  $\mu\text{g mL}^{-1}$  of protective mAb 18B7  
25 (IgG1).

26

27 **Movie S6.** Same information as in Movie 5. However, encapsulated H99 *C. neoformans*  
28 yeast cells are of control (no mAb) or 0.01, 0.1, 0.5, 1.0, 10, and 20  $\mu\text{g mL}^{-1}$  of  
29 protective mAb 2D10 (IgM).

30

31 **Movie S7.** Same information as in Movie 5. However, encapsulated H99 *C. neoformans*  
32 yeast cells are of control (no mAb) or 0.01, 0.1, 0.5, 1.0, 10, and 20  $\mu\text{g mL}^{-1}$  of non-  
33 protective mAb 13F1 (IgM).

34

35 **Movie S8.** Same information as in Movie 5. However, encapsulated H99 *C. neoformans*  
36 yeast cells are of control (no mAb) or 0.01, 0.1, 0.5, 1.0, 10, and 20  $\mu\text{g mL}^{-1}$  of  
37 protective mAb 3E5 IgG1.

38

39 **Movie S9.** Same information as in Movie S5. However, encapsulated H99 *C.*  
40 *neoformans* yeast cells are of control (no mAb) or 0.01, 0.1, 0.5, 1.0, 10, and 20  $\mu\text{g mL}^{-1}$   
41 of protective mAb 3E5 IgG2a.

42

43 **Movie S10.** Same information as in Movie S5. However, encapsulated H99 *C.*  
44 *neoformans* yeast cells are of control (no mAb) or 0.01, 0.1, 0.5, 1.0, 10, and 20  $\mu\text{g mL}^{-1}$   
45 of protective mAb 3E5 IgG2b.

46

47 **Movie S11.** Same information as in Movie S5. However, encapsulated H99 *C.*  
48 *neoformans* yeast cells are of control (no mAb) or 0.01, 0.1, 0.5, 1.0, 10, and 20  $\mu\text{g mL}^{-1}$   
49 of non-protective mAb 3E5 IgG3.
